# Supplementary material for: Risk factors for violent crime in patients with schizophrenia: a retrospective study
Source: PeerJ. 2024 Sep 18;12:e18014. doi: 10.7717/peerj.18014 (PMC11416098; doi:10.7717/peerj.18014)
Supplement: Data S1 [file peerj-12-18014-s001.xlsx]

## Sheet: data
Group	Duration of untreated psychosis(years)	Age(years)	Treatment in the previous four weeks	Previous treatment	Apathy	Family history of mental disorders	Unemployed	Low education	Residence	Sex	Marital status	Command hallucinations	Persecutory delusions	Delusions of jealousy	Depression	Excitement	History of violence	Insight	History of self-harm	History of drug use	Alcohol abuse	Han Chinese	violent group	Length of illness(years)
1=Homicide, 2=Intentional injury, 3=Non-violent			1=Yes, 0=No	1=Yes, 0=No	1=Yes, 0=No	1=Yes, 0=No	1=Yes, 0=No	1=Yes, 0=No	1=Rural,0=Urban	1=Male, 0=Female	1=Unmarried, 0=married	1=Yes, 0=No	1=Yes, 0=No	1=Yes, 0=No	1=Yes, 0=No	1=Yes, 0=No	1=Yes, 0=No	1=Yes, 0=No	1=Yes, 0=No	1=Yes, 0=No	1=Yes, 0=No	1=Yes, 0=No	1=Yes, 0=No
1	0	42	0	0	0	0	0	1	1	1	1	0	1	0	0	0	0	0	0	0	0	1	1	0
1	4	29	0	1	1	0	1	0	1	1	1	0	1	0	0	0	1	0	0	0	0	1	1	7
1	2	24	0	1	0	0	1	1	1	0	0	1	1	0	0	1	0	0	1	0	0	0	1	3
1	0	22	0	1	0	0	1	1	1	1	1	1	1	0	0	1	1	0	0	0	0	1	1	2
1	3	34	0	0	0	0	0	1	1	1	0	0	0	1	1	0	0	0	0	0	0	1	1	3
1	1	25	0	0	0	1	1	1	1	0	0	0	1	1	0	0	0	0	1	0	0	1	1	1
1	3	35	0	1	0	0	1	1	1	1	1	0	1	0	0	1	1	0	0	0	0	1	1	5
1	0	18	0	1	0	0	1	1	1	1	1	0	1	0	0	0	1	0	0	0	0	1	1	2
1	14	40	1	1	0	0	1	1	1	1	1	0	0	0	0	0	1	0	0	0	0	1	1	16
1	0	29	0	0	0	0	1	1	1	0	0	0	1	0	0	0	1	0	0	0	0	0	1	0
1	2	52	0	0	0	0	1	1	1	1	0	0	1	1	0	0	1	0	0	0	0	1	1	2
1	0	39	0	1	1	0	1	1	0	1	1	0	1	0	0	0	0	0	0	0	0	1	1	7
1	0	41	0	1	1	0	1	1	0	0	1	0	0	0	0	0	0	0	0	0	0	1	1	13
1	1	33	0	1	1	0	1	1	1	1	1	0	1	0	0	0	1	0	0	0	0	1	1	7
1	13	42	0	1	1	0	1	1	1	1	0	0	1	0	0	0	1	0	0	0	0	1	1	13
1	5	46	0	0	0	0	1	1	1	1	0	0	1	0	0	0	1	0	0	0	0	1	1	5
1	2	18	0	0	1	0	1	0	1	1	1	0	1	0	0	0	0	0	0	0	0	1	1	2
1	0	27	0	1	0	0	1	1	1	0	1	1	1	0	0	0	1	0	1	0	0	0	1	3
1	3	31	1	1	0	0	1	0	1	1	1	1	1	0	0	0	1	0	0	0	0	1	1	13
1	6	23	0	0	0	0	1	0	1	1	1	0	1	0	0	0	1	0	1	0	0	1	1	6
1	2	25	0	1	0	0	1	1	1	1	1	0	0	0	0	0	1	0	0	0	0	1	1	5
1	3	32	0	1	0	0	1	0	1	1	1	0	0	0	0	0	1	0	0	0	0	1	1	12
1	0	34	0	0	0	0	1	0	1	1	1	0	1	0	0	0	1	0	1	0	0	1	1	2
1	2	27	0	1	1	0	1	0	1	1	1	0	0	0	0	0	1	0	0	0	0	1	1	7
1	0	24	0	1	0	0	1	1	1	1	1	0	0	0	0	1	1	0	0	0	0	1	1	5
1	2	21	1	1	0	0	1	1	1	1	1	0	0	0	1	0	1	0	0	0	0	1	1	8
1	1	45	0	1	0	0	1	0	1	1	1	0	0	0	0	1	1	0	0	0	0	1	1	20
1	1	32	0	1	1	0	1	0	1	0	0	0	0	1	0	0	1	0	0	0	0	1	1	9
1	0	33	0	0	0	0	1	1	1	1	1	0	1	0	0	0	0	0	1	0	0	0	1	0
1	10	48	0	0	0	0	1	1	1	1	1	0	1	0	0	0	0	0	0	0	0	1	1	10
1	0	20	0	1	0	1	1	0	1	1	1	1	1	0	1	0	0	0	1	0	0	1	1	1
1	0	46	0	0	1	0	1	1	1	1	1	0	1	0	0	0	0	0	1	0	0	1	1	0
1	14	47	0	0	1	0	1	1	1	1	0	0	1	0	0	0	0	0	0	0	0	1	1	14
1	1	18	0	1	0	0	1	0	1	0	1	0	0	0	0	0	1	0	0	0	0	1	1	3
1	7	41	0	1	0	0	1	1	1	0	0	0	1	0	0	0	1	0	0	0	0	1	1	7
1	0	27	0	1	1	0	1	1	1	1	1	0	0	0	0	0	0	0	1	0	0	1	1	5
1	2	37	0	0	0	0	1	1	1	1	1	0	1	0	0	0	1	0	0	0	0	1	1	2
1	2	46	0	1	1	1	1	1	1	1	0	0	0	0	0	0	1	0	0	0	0	1	1	16
1	0	44	0	1	0	0	1	0	1	1	0	0	1	0	0	1	0	0	0	0	0	1	1	7
1	4	39	0	1	0	0	1	1	1	1	1	0	1	0	0	0	1	0	0	0	0	1	1	9
1	0	26	0	1	0	0	1	0	0	1	1	0	1	0	0	0	0	0	0	0	0	1	1	6
1	0	24	0	1	0	0	1	1	1	0	0	0	1	0	0	0	0	0	0	0	0	1	1	3
1	21	50	0	1	0	0	0	0	0	1	0	0	0	0	0	1	1	0	0	0	0	1	1	21
1	1	25	0	1	0	0	1	1	1	1	1	0	1	0	0	0	0	0	0	0	0	1	1	9
1	2	36	0	1	0	0	1	0	1	1	1	0	1	0	0	0	1	0	0	0	0	1	1	12
1	1	31	0	1	0	1	1	0	1	0	1	0	0	0	0	0	0	0	0	0	0	1	1	6
1	7	46	0	0	0	0	1	1	1	1	1	0	1	0	0	0	0	0	0	0	0	1	1	7
1	25	50	0	1	0	0	1	1	1	1	1	0	0	0	0	0	1	0	0	0	0	1	1	26
1	3	23	1	1	1	0	1	1	1	1	1	0	1	0	0	0	1	0	0	0	0	1	1	7
1	10	51	0	0	0	0	1	1	1	1	1	0	0	0	0	0	0	0	0	0	0	1	1	10
1	6	42	0	1	0	0	1	0	1	1	1	0	1	0	0	0	0	0	0	0	0	1	1	11
1	0	38	0	1	0	0	1	1	1	1	1	0	1	0	0	0	1	0	0	0	0	1	1	18
1	1	23	0	1	0	0	1	1	1	1	1	0	0	0	0	0	1	0	0	0	0	1	1	8
1	2	40	0	0	0	0	1	0	1	1	1	0	1	0	0	0	0	0	0	0	0	0	1	2
1	24	47	0	1	0	0	0	0	1	1	0	0	1	0	1	0	1	0	0	0	0	1	1	30
1	0	33	1	1	0	0	1	1	1	1	0	0	1	0	0	0	1	0	0	0	0	1	1	12
1	4	28	0	0	1	0	1	1	1	1	1	0	1	0	0	0	0	0	0	0	0	1	1	4
1	0	52	0	0	0	0	1	0	1	1	0	0	1	0	0	0	0	0	0	0	0	1	1	0
1	30	54	0	0	0	0	1	1	1	1	0	0	1	0	0	0	0	0	0	0	0	1	1	30
1	1	21	1	1	1	0	1	1	1	1	1	0	1	0	0	0	0	0	0	0	0	0	1	6
1	0	20	0	0	0	0	1	0	1	1	0	0	1	0	0	0	0	0	0	0	0	1	1	4
1	0	27	0	1	0	0	1	0	1	1	0	0	1	0	0	0	0	0	0	0	0	0	1	4
1	4	38	0	1	0	0	1	1	1	1	1	0	0	0	0	0	1	0	1	0	0	1	1	10
1	0	26	0	1	0	0	1	1	1	1	1	0	1	0	0	0	1	0	0	0	0	1	1	1
1	15	52	0	1	0	0	0	1	1	0	0	0	1	1	0	0	1	0	0	0	0	1	1	15
1	1	36	0	0	0	0	1	1	1	1	1	0	0	0	0	0	1	0	0	0	0	1	1	16
1	1	23	0	1	0	0	1	1	1	1	0	0	1	0	0	0	1	0	0	0	0	1	1	1
1	2	49	0	1	0	0	1	1	1	0	0	1	0	0	0	0	1	0	0	0	0	1	1	3
1	0	49	0	1	0	0	0	0	0	0	0	0	1	0	0	0	0	0	1	0	0	1	1	20
1	2	29	0	0	0	0	1	1	1	1	1	0	0	0	0	0	0	0	0	0	0	1	1	2
1	4	39	0	1	1	0	1	1	1	0	0	0	0	0	0	0	1	0	0	0	0	1	1	7
1	11	44	0	0	1	0	1	1	1	1	1	0	0	0	0	0	0	0	0	0	0	0	1	11
1	25	40	0	0	0	0	1	1	0	1	1	0	1	0	1	0	0	0	0	0	0	1	1	25
1	0	40	0	0	1	0	1	1	1	1	1	1	1	0	0	0	0	0	0	0	0	1	1	0
1	10	44	0	0	0	0	1	0	1	1	1	0	1	0	0	0	1	0	0	0	0	1	1	10
1	0	31	0	1	0	0	1	1	1	1	1	0	1	0	0	0	1	0	0	0	0	1	1	1
1	21	42	0	0	0	0	1	1	1	1	1	0	1	0	0	0	1	0	0	0	0	1	1	21
1	0	40	0	1	0	0	0	0	1	1	0	0	1	1	0	0	1	0	0	0	0	1	1	13
1	25	48	0	0	0	0	1	1	1	1	0	0	0	0	0	0	1	0	0	0	0	0	1	25
1	14	30	0	1	0	0	1	1	1	1	0	0	1	0	0	0	1	0	0	0	0	1	1	14
1	3	21	0	0	0	0	1	1	1	1	1	0	1	0	0	0	0	0	0	0	0	1	1	3
1	10	49	0	1	0	0	1	0	1	1	1	0	1	0	0	0	1	0	0	0	0	1	1	10
1	4	35	0	0	0	0	1	0	1	1	1	0	1	0	0	0	1	0	0	0	0	1	1	4
1	1	41	0	1	0	0	1	1	1	1	0	0	1	0	0	0	1	0	0	0	0	0	1	1
1	3	41	0	1	0	0	1	1	1	1	1	0	0	0	0	0	0	0	0	0	0	1	1	6
1	1	34	0	1	1	0	1	1	1	1	0	0	1	0	0	0	0	0	0	0	0	1	1	4
1	25	42	0	1	0	0	1	0	1	1	0	0	0	0	0	0	0	0	0	0	0	1	1	25
1	12	35	0	1	0	0	1	1	1	0	0	0	1	0	0	0	1	0	0	0	0	1	1	13
1	0	31	0	1	0	0	1	1	1	1	0	0	0	0	0	0	0	0	0	0	0	1	1	7
1	3	23	0	1	0	0	1	1	1	1	0	0	0	0	0	0	1	0	0	0	0	1	1	6
1	0	41	0	1	0	1	1	1	1	1	0	1	0	0	1	0	1	0	0	0	0	1	1	1
1	0	34	0	1	0	0	1	1	0	1	0	0	1	0	0	0	0	0	0	0	0	1	1	5
1	20	49	0	1	1	0	1	1	1	1	1	0	1	0	0	0	1	0	0	0	0	1	1	20
1	1	49	0	1	0	0	1	1	0	1	0	0	1	0	0	0	1	0	0	0	0	1	1	1
1	5	25	0	1	1	0	1	0	1	1	1	1	1	0	0	0	0	0	0	0	0	1	1	5
1	9	54	0	1	1	0	1	1	1	1	0	0	1	0	0	0	0	0	0	0	0	1	1	12
1	1	35	0	1	1	0	1	0	1	1	1	0	1	0	0	0	0	0	0	0	0	1	1	15
1	0	19	0	1	0	0	1	1	1	1	1	0	1	0	0	0	0	0	0	0	0	1	1	4
1	16	53	0	0	0	0	0	0	0	1	1	0	1	0	0	0	0	0	0	0	0	1	1	16
1	7	56	0	0	0	0	1	1	1	0	0	0	1	1	0	0	0	0	1	0	0	1	1	7
1	0	25	0	1	0	0	1	1	1	1	1	1	1	0	1	0	0	0	0	0	0	1	1	10
1	30	47	0	0	1	0	1	1	1	1	1	0	1	0	0	0	1	0	0	0	0	1	1	30
1	4	25	0	1	0	0	1	0	1	1	1	0	1	0	0	0	1	0	1	0	0	1	1	4
1	0	28	0	1	0	0	1	1	1	1	1	0	0	0	0	0	1	0	0	0	0	0	1	5
1	0	38	0	1	0	0	1	0	0	1	1	0	1	0	0	0	1	0	0	0	0	1	1	9
1	3	26	0	1	0	1	1	1	1	1	1	1	1	0	0	0	1	0	0	0	0	1	1	3
1	1	24	1	1	1	0	1	1	0	1	1	0	1	0	0	0	1	0	0	0	0	1	1	7
1	18	50	0	0	0	0	1	1	1	1	1	0	1	0	0	0	1	0	0	0	0	1	1	18
1	6	52	0	1	0	0	0	0	0	0	0	0	0	0	0	0	0	0	0	0	0	1	1	14
1	0	33	0	1	0	0	1	1	1	1	1	0	1	0	0	0	1	0	0	0	0	1	1	6
1	4	26	0	1	0	0	1	1	1	1	1	0	1	0	0	0	1	0	0	0	0	1	1	6
1	1	29	0	0	0	0	1	1	1	1	1	0	1	0	0	0	1	0	0	0	0	1	1	1
1	0	48	0	1	0	0	0	0	0	1	1	0	1	0	0	0	0	0	0	0	0	1	1	7
1	1	42	1	1	0	0	1	1	1	0	0	0	1	0	0	0	1	0	1	0	0	1	1	14
1	1	28	0	1	1	1	1	0	1	1	1	0	1	0	0	0	1	0	1	0	0	1	1	3
1	0	30	0	1	1	0	1	0	1	0	1	1	0	0	0	0	0	0	0	0	0	1	1	3
1	1	22	0	1	0	0	1	1	1	1	1	0	0	0	0	0	1	0	0	0	0	1	1	2
1	0	38	0	1	0	0	1	1	1	1	1	0	1	0	0	0	0	0	0	0	0	1	1	3
1	6	38	0	0	0	0	1	1	1	1	1	0	0	0	0	0	1	0	0	0	0	0	1	6
1	12	30	0	1	0	0	1	0	1	1	1	0	0	0	0	0	1	0	0	0	0	1	1	16
1	0	33	0	0	0	0	1	1	1	1	1	0	0	0	0	0	0	0	0	0	0	1	1	0
1	0	30	0	1	1	0	1	1	1	1	1	0	0	0	0	0	1	0	0	0	0	1	1	18
1	2	42	0	1	0	0	1	1	1	1	0	0	0	0	0	0	1	0	0	0	0	1	1	5
1	1	35	1	1	1	0	1	1	1	0	0	0	0	0	0	0	0	0	0	0	0	1	1	10
1	5	26	0	0	1	0	1	1	1	1	1	0	0	0	0	0	1	0	0	0	0	0	1	5
1	0	30	0	1	1	0	1	1	1	1	1	0	0	0	0	0	1	0	0	0	0	1	1	8
1	10	38	0	0	0	0	1	1	1	1	1	0	1	0	0	0	0	1	0	0	0	1	1	10
1	8	43	0	0	0	0	1	1	1	0	0	0	0	0	0	0	0	0	0	0	0	0	1	8
1	2	18	0	0	0	0	1	1	1	0	1	0	1	0	0	0	0	0	0	0	0	1	1	8
1	0	41	0	1	1	0	1	1	1	1	1	1	0	0	0	0	1	0	0	0	0	1	1	14
1	0	29	0	1	1	0	0	1	1	1	1	0	0	0	0	0	0	0	0	0	0	1	1	8
1	3	50	0	1	0	1	1	1	1	1	1	0	1	0	0	0	0	1	0	0	0	1	1	3
1	2	26	0	1	0	0	1	0	1	1	1	0	1	0	0	0	1	0	0	0	0	1	1	3
1	0	24	0	1	0	0	1	1	0	1	0	0	0	0	0	0	0	0	0	0	0	1	1	6
1	5	24	1	1	0	0	1	0	1	1	1	0	1	0	0	0	0	0	0	0	0	1	1	5
1	25	41	0	1	0	1	1	0	0	1	1	0	1	0	0	0	0	0	0	0	0	1	1	27
1	13	53	0	1	0	1	1	1	1	0	0	0	1	1	0	0	0	0	0	0	0	1	1	13
1	5	39	0	1	1	0	1	0	0	1	1	0	1	0	0	0	1	0	0	0	0	0	1	5
1	2	49	0	0	1	0	1	1	1	1	1	0	1	0	0	0	1	0	0	0	0	1	1	30
1	9	34	0	0	1	0	1	1	1	1	1	0	0	0	0	0	0	0	1	0	0	1	1	9
1	10	45	0	1	0	0	1	1	1	1	1	0	0	0	0	0	1	0	0	0	0	1	1	10
1	6	42	0	0	0	0	1	1	1	1	0	0	1	0	0	0	0	0	0	0	0	1	1	6
1	0	41	0	1	1	1	1	1	1	1	1	0	1	0	0	0	1	0	1	0	0	1	1	0
1	0	27	0	1	1	0	1	1	1	1	0	0	0	0	0	0	1	0	0	0	0	1	1	9
1	0	30	0	1	1	0	1	0	1	1	1	0	1	0	0	0	1	0	0	0	0	1	1	5
1	1	27	0	1	1	0	1	1	1	1	1	0	1	0	0	0	0	0	0	0	0	1	1	8
1	29	51	0	0	1	0	1	1	1	1	1	0	0	0	0	0	1	0	0	0	0	1	1	29
1	11	27	0	0	0	0	1	1	1	1	1	0	0	0	0	0	1	0	0	0	0	1	1	11
1	0	41	0	1	0	0	1	1	1	0	0	0	0	0	0	0	0	0	0	0	0	1	1	19
1	10	33	0	1	0	0	1	0	0	0	1	0	1	0	0	0	1	0	0	0	0	0	1	10
1	1	25	0	1	1	0	1	1	1	1	1	0	1	0	0	0	1	0	0	0	0	1	1	3
1	0	49	0	0	1	0	1	1	1	1	1	0	1	0	1	0	1	0	0	0	0	1	1	0
1	0	23	0	1	1	0	1	1	1	1	1	0	1	0	0	0	1	0	0	0	1	1	1	8
1	2	28	0	1	0	0	0	0	1	1	1	0	0	0	0	0	0	1	0	1	1	1	1	7
1	21	43	0	1	1	0	0	0	0	0	1	0	1	0	0	0	0	0	0	1	1	1	1	21
2	4	41	0	1	0	1	1	1	1	1	1	1	1	0	0	0	1	0	0	0	0	1	1	4
2	0	38	0	0	1	1	0	0	0	1	1	0	1	0	0	0	0	0	0	0	0	0	1	0
2	0	48	0	1	0	1	1	1	1	0	0	0	1	0	1	0	0	0	0	0	0	1	1	25
2	10	35	0	1	1	1	1	1	1	1	1	0	1	0	0	0	1	0	0	0	0	1	1	14
2	1	34	0	0	0	1	1	0	1	1	0	0	1	0	0	0	0	0	0	0	0	1	1	1
2	0	25	0	1	0	1	1	1	1	0	0	0	1	0	1	0	0	0	0	0	0	1	1	1
2	1	28	0	0	0	1	1	1	1	1	1	0	0	0	0	0	1	0	0	0	0	1	1	1
2	0	20	0	1	0	1	1	1	1	1	1	0	0	0	0	0	0	0	0	0	0	1	1	1
2	20	42	0	1	1	1	1	1	1	1	0	0	0	0	0	0	1	0	0	0	0	1	1	20
2	0	36	0	1	1	1	1	1	0	1	1	0	1	0	0	0	0	0	0	0	0	1	1	2
2	0	44	0	1	0	2	0	1	0	1	1	0	0	0	0	0	0	1	0	0	0	1	1	10
2	18	38	1	1	0	1	1	1	1	1	0	0	1	0	0	0	1	0	0	0	0	1	1	20
2	0	30	0	1	0	1	1	1	1	1	1	0	1	0	0	0	1	0	0	0	0	1	1	1
2	4	27	0	0	0	1	1	1	1	1	1	0	1	0	0	0	1	0	0	0	0	1	1	4
2	0	26	0	1	0	1	1	1	0	1	1	0	1	0	0	0	0	0	0	0	0	1	1	2
2	0	58	1	1	0	1	1	1	1	0	0	0	1	0	0	0	1	1	0	0	0	1	1	5
2	1	21	0	0	0	1	1	1	1	1	1	0	1	0	1	0	1	0	0	0	0	0	1	1
2	10	33	0	0	1	1	1	0	1	1	0	0	1	0	0	0	1	0	0	0	0	1	1	10
2	3	37	0	1	0	1	1	1	1	1	1	0	1	0	0	0	1	0	0	0	0	1	1	6
2	5	26	0	1	0	1	1	1	1	1	1	0	1	0	1	0	0	0	0	0	0	1	1	5
2	9	31	0	1	0	1	1	0	0	0	0	0	0	0	0	0	1	0	0	0	0	1	1	10
2	0	29	0	1	1	1	1	1	1	1	1	0	0	0	0	0	1	0	0	0	0	1	1	6
2	13	40	0	0	0	1	1	0	1	1	0	0	0	0	0	1	1	0	0	0	0	1	1	13
2	0	18	1	1	0	1	1	0	1	1	1	0	0	0	1	0	1	0	1	0	0	1	1	1
2	21	40	0	1	0	1	1	0	1	1	1	0	1	0	0	1	1	0	0	0	0	1	1	21
2	0	40	0	1	0	1	1	1	1	1	1	0	0	0	0	0	0	1	0	0	0	1	1	7
2	6	35	0	1	0	1	1	1	1	1	1	1	1	0	0	0	1	0	0	0	0	1	1	6
2	1	45	0	1	0	1	1	0	1	1	1	0	1	1	0	0	0	0	0	0	0	1	1	16
2	0	31	1	1	0	1	1	0	1	1	0	0	0	1	0	0	0	0	0	0	0	1	1	0
2	0	41	0	0	1	1	1	1	1	1	1	1	1	0	0	0	0	0	0	0	0	0	1	0
2	7	46	0	0	0	1	1	1	1	1	0	1	1	1	0	0	1	0	0	0	0	1	1	7
2	4	34	0	1	1	1	1	0	0	1	1	0	1	0	0	0	0	0	0	0	0	1	1	5
2	0	33	1	1	0	1	1	0	1	1	1	0	1	0	0	0	1	0	0	0	0	1	1	0
2	1	32	0	1	0	1	1	0	1	1	1	0	0	0	0	0	0	0	0	0	0	1	1	7
2	1	26	0	0	0	1	0	0	1	1	1	0	1	0	0	0	0	0	0	0	0	1	1	1
2	18	36	0	0	0	1	1	0	1	1	1	0	1	0	0	0	0	0	0	0	0	1	1	18
2	0	27	0	1	0	1	1	0	1	1	0	0	0	0	0	0	0	0	0	0	0	1	1	7
2	1	18	0	1	0	1	1	1	1	1	1	0	0	0	0	1	1	0	0	0	0	1	1	1
2	7	40	0	0	0	1	1	1	0	1	1	0	1	0	0	0	0	0	0	0	0	1	1	7
2	0	33	0	1	0	1	0	0	0	1	0	0	1	0	0	0	0	0	0	0	0	1	1	10
2	21	51	0	1	0	1	1	1	1	0	0	0	1	0	0	0	0	0	0	0	0	1	1	21
2	26	46	0	1	0	1	0	0	0	1	1	0	1	0	0	0	0	0	0	0	0	1	1	26
2	3	34	0	1	0	1	1	1	1	0	1	0	0	0	0	0	0	0	0	0	0	1	1	9
2	10	42	0	1	0	1	1	1	1	1	1	0	1	0	0	0	1	0	1	0	0	1	1	10
2	3	29	0	1	0	1	1	1	1	1	1	0	0	0	0	0	1	0	0	0	0	1	1	5
2	1	43	0	0	0	1	1	1	1	1	0	0	0	0	0	0	0	0	0	0	0	1	1	1
2	10	27	0	1	0	1	1	0	1	1	0	0	0	0	0	0	0	0	0	0	0	1	1	10
2	0	26	0	1	0	1	1	1	1	1	1	0	1	0	0	0	1	0	0	0	0	1	1	2
2	0	34	0	0	1	1	1	1	1	1	1	0	1	0	0	0	0	0	0	0	0	1	1	0
2	3	30	0	1	0	1	1	0	1	1	0	0	1	0	1	0	1	0	0	0	0	1	1	6
2	10	33	0	1	1	1	1	1	1	0	0	0	0	1	0	0	0	0	0	0	0	1	1	13
2	1	29	0	1	0	2	1	1	1	0	1	0	0	0	0	0	0	0	0	0	0	1	1	3
2	9	27	0	0	0	1	1	1	1	1	0	0	1	0	0	0	1	0	1	0	0	1	1	9
2	3	31	1	1	0	1	1	1	1	1	1	0	0	0	0	0	1	0	0	0	0	1	1	10
2	7	27	0	0	0	1	1	1	1	1	1	0	1	0	0	0	0	0	0	0	0	1	1	7
2	10	50	0	1	0	1	1	0	0	0	0	0	0	0	0	0	1	0	0	0	0	1	1	20
2	0	56	0	1	0	1	0	1	0	1	1	0	1	0	0	0	0	0	0	0	0	1	1	26
2	2	32	0	0	0	1	1	1	1	1	1	0	0	0	0	0	0	0	0	0	0	1	1	2
2	1	20	0	0	0	1	1	1	1	1	1	0	0	0	0	0	0	0	0	0	0	1	1	1
2	21	40	0	1	0	1	1	1	1	1	1	0	1	0	0	0	1	0	0	0	0	1	1	21
2	1	33	0	0	0	1	1	1	1	1	1	0	1	0	0	0	0	0	0	0	0	1	1	1
2	2	51	0	0	0	1	1	0	1	1	1	0	1	0	0	0	1	0	1	0	0	1	1	2
2	0	48	0	0	0	1	1	1	1	0	1	0	1	0	0	0	1	0	0	0	0	0	1	0
2	5	46	0	1	0	1	1	1	1	1	1	0	0	0	0	0	1	0	0	0	0	1	1	16
2	12	34	0	1	0	1	1	1	1	1	0	0	1	0	0	0	0	0	0	0	0	0	1	12
2	0	60	0	1	0	1	1	1	1	1	0	0	1	0	0	0	0	0	0	0	0	1	1	19
2	5	31	0	1	0	1	1	0	1	1	1	0	1	1	0	0	0	0	0	0	0	1	1	7
2	24	42	0	1	0	1	1	0	0	0	0	0	0	0	0	0	0	0	0	0	0	1	1	24
2	26	44	0	1	0	1	1	1	1	1	1	0	1	0	0	0	0	0	0	0	0	0	1	26
2	1	28	0	0	1	2	1	1	1	1	0	0	1	0	0	0	1	0	0	0	0	1	1	1
2	0	25	0	1	0	1	1	1	1	1	0	0	0	0	0	0	1	0	0	0	0	1	1	1
2	0	31	0	1	0	1	1	1	1	1	1	0	0	0	0	0	1	0	0	0	0	1	1	2
2	2	34	0	1	0	1	1	1	1	1	1	0	0	0	0	0	0	0	0	0	0	1	1	4
2	0	32	1	1	0	1	1	0	0	1	1	0	0	0	0	0	1	0	0	0	0	1	1	12
2	1	25	0	1	0	1	1	0	1	1	1	0	0	0	0	0	0	1	0	0	0	1	1	1
2	0	33	0	1	0	1	1	1	1	1	1	0	1	0	0	0	0	0	0	0	0	1	1	1
2	18	37	0	1	0	1	1	1	1	1	1	0	0	0	0	0	1	0	0	0	0	1	1	18
2	9	44	0	1	0	1	1	1	0	1	0	0	0	0	0	0	1	0	0	0	0	1	1	23
2	0	25	0	1	0	1	1	1	1	1	0	0	0	0	0	0	1	0	0	0	0	0	1	5
2	5	34	0	1	0	1	1	1	0	0	1	0	1	0	0	0	0	0	0	0	0	1	1	5
2	4	33	1	1	0	1	1	1	0	1	1	1	1	0	1	0	1	0	1	0	0	1	1	14
2	10	42	0	0	0	1	1	1	1	1	1	0	1	0	0	0	0	0	0	0	0	1	1	10
2	6	32	0	1	0	1	1	1	1	1	0	1	0	0	0	0	1	0	0	0	0	1	1	8
2	2	32	0	0	0	1	1	1	1	1	0	0	1	0	0	0	1	0	0	0	0	1	1	6
2	27	51	0	1	0	1	1	0	0	1	0	0	1	0	0	0	1	0	0	0	0	1	1	27
2	12	44	0	0	0	1	0	1	1	1	1	0	1	0	0	0	1	0	0	0	0	1	1	12
2	6	36	0	1	0	1	1	1	1	0	0	0	1	0	0	0	0	0	0	0	0	1	1	7
2	5	48	1	1	0	1	1	1	1	0	0	0	0	0	0	0	0	0	0	0	0	1	1	15
2	3	28	0	1	1	1	1	1	1	0	0	0	1	0	0	0	1	0	0	0	0	1	1	3
2	1	21	1	1	0	1	1	1	1	1	0	0	1	0	0	0	0	0	0	0	0	1	1	2
2	21	51	0	1	0	1	1	1	1	1	0	0	1	0	0	0	0	0	0	0	0	1	1	21
2	2	29	0	1	1	1	1	1	1	1	0	0	1	0	0	0	0	0	1	0	0	1	1	10
2	8	42	0	1	0	1	1	0	0	0	1	1	0	0	0	0	1	0	0	0	0	1	1	9
2	4	42	0	0	0	1	1	1	1	1	0	0	1	1	0	0	1	0	0	0	0	1	1	4
2	5	21	0	1	0	2	1	1	1	1	1	0	1	0	0	0	0	0	0	0	0	1	1	5
2	0	25	0	1	0	2	1	0	1	1	1	0	1	0	0	0	0	0	1	0	0	1	1	2
2	0	31	0	0	0	2	1	1	1	1	1	0	1	0	0	0	1	0	0	0	0	1	1	0
2	0	25	1	1	0	1	1	0	0	0	1	0	1	0	1	0	1	0	0	0	0	1	1	1
2	0	28	1	1	0	1	1	1	1	1	1	0	0	0	0	0	0	0	0	0	0	1	1	11
2	0	34	1	1	1	1	1	0	1	1	1	0	1	0	0	0	1	0	0	0	0	1	1	17
2	3	50	0	0	0	1	1	1	1	1	0	0	1	1	1	0	0	0	1	0	0	1	1	3
2	7	48	0	1	0	1	1	0	1	0	1	0	1	0	0	0	0	0	0	0	0	1	1	18
2	11	41	0	0	0	1	1	1	1	0	1	1	1	0	1	0	1	0	0	0	0	1	1	11
2	1	48	0	0	0	1	1	1	1	1	1	0	0	0	0	0	0	0	0	0	0	1	1	1
2	1	32	1	1	0	1	1	1	1	1	1	0	0	0	0	0	1	1	0	0	0	1	1	13
2	0	29	0	0	0	1	0	1	1	1	0	0	1	1	0	0	0	0	0	0	0	0	1	0
2	16	45	0	0	0	1	1	1	1	1	1	0	1	0	0	0	0	0	0	0	0	1	1	16
2	8	41	0	0	1	1	0	0	0	1	1	0	0	0	0	0	1	0	0	0	0	1	1	8
2	0	48	0	0	0	1	1	1	1	1	0	0	1	1	0	0	0	0	0	0	0	1	1	0
2	16	38	0	0	1	1	1	1	1	1	1	0	1	0	0	0	1	0	0	0	0	1	1	16
2	0	30	1	1	0	1	1	1	1	1	1	0	1	0	0	0	1	0	0	0	0	1	1	6
2	7	40	1	1	0	1	1	1	0	1	0	0	1	1	0	0	0	0	1	0	0	1	1	7
2	4	38	0	1	0	1	1	1	1	1	1	0	0	0	0	0	0	0	0	0	0	0	1	4
2	0	24	1	1	0	1	1	1	1	1	1	0	1	0	0	0	1	0	0	0	0	1	1	6
2	10	43	0	0	1	1	1	1	1	1	1	1	1	0	0	0	0	0	0	0	0	1	1	10
2	0	34	1	1	0	1	1	0	1	1	1	0	0	0	0	0	1	1	0	0	0	1	1	14
2	1	44	0	1	0	1	1	0	0	1	1	0	0	0	0	0	1	0	0	0	0	0	1	5
2	0	37	1	1	0	1	1	0	0	1	1	1	0	0	0	0	1	0	0	0	0	1	1	18
2	5	29	1	1	1	1	1	1	1	1	1	0	1	0	0	0	1	0	0	0	0	1	1	11
2	4	24	0	0	1	1	1	0	0	1	1	1	0	0	0	0	0	0	0	0	0	1	1	4
2	0	41	0	0	0	1	1	0	1	1	1	0	0	0	0	0	1	0	0	0	0	1	1	0
2	2	38	0	0	0	1	1	1	1	1	1	0	0	0	0	0	1	0	0	0	0	1	1	2
2	2	33	0	0	0	1	0	0	1	0	1	0	0	0	0	0	0	0	0	0	0	1	1	13
2	12	31	0	0	0	2	1	0	1	1	1	0	1	0	0	0	1	0	0	0	0	1	1	12
2	0	39	1	1	0	2	1	0	0	1	1	0	0	0	0	0	0	0	0	0	0	1	1	9
2	3	43	0	1	1	1	1	1	1	1	1	0	0	0	0	0	1	0	0	0	0	1	1	3
2	20	34	0	0	0	1	1	1	1	1	1	0	0	0	1	0	1	0	0	0	0	1	1	20
2	0	34	0	1	0	1	0	1	1	1	1	0	0	0	0	0	1	1	0	0	0	1	1	19
2	6	28	0	0	0	1	1	0	1	1	1	0	0	0	0	0	0	0	0	0	0	1	1	6
2	0	35	0	1	1	1	1	0	1	1	1	0	0	0	0	0	0	0	0	0	0	1	1	14
2	0	27	1	1	0	1	1	0	1	1	1	0	1	0	0	0	1	0	0	0	0	1	1	3
2	1	32	0	1	0	1	1	0	1	1	1	0	0	0	0	0	1	0	0	0	0	1	1	12
2	0	28	0	1	0	1	1	0	1	1	1	0	1	0	0	0	0	0	0	0	0	1	1	8
2	1	32	0	1	1	1	1	0	1	1	1	0	1	0	0	0	0	0	0	0	0	1	1	2
2	11	50	0	1	1	1	1	1	0	0	0	1	1	0	0	0	1	0	0	0	0	1	1	11
2	0	43	0	0	0	1	1	1	1	1	0	0	1	0	1	0	0	0	0	0	0	0	1	0
2	10	44	0	0	0	1	1	1	1	1	1	0	1	0	0	0	0	0	0	0	0	1	1	10
2	2	56	0	1	1	1	1	1	1	1	1	0	0	0	0	0	1	0	0	0	0	1	1	2
2	14	35	1	1	0	1	1	1	1	1	1	0	0	0	0	0	1	1	0	0	0	1	1	14
2	8	48	0	0	1	1	1	1	0	0	1	0	1	0	0	0	1	0	0	0	0	1	1	8
2	10	42	0	1	0	1	1	1	1	1	1	0	0	0	0	0	1	0	0	0	0	1	1	10
2	3	39	0	0	0	1	1	1	1	1	1	0	0	0	0	0	1	0	0	0	0	1	1	3
2	17	37	1	1	0	1	1	0	1	1	1	0	1	0	0	0	1	0	0	0	0	1	1	17
2	1	30	0	0	0	1	1	1	1	1	1	0	1	0	1	0	0	0	0	0	0	1	1	1
2	0	42	0	0	0	1	0	0	0	1	1	0	0	0	0	0	0	0	0	0	0	1	1	0
2	0	32	0	1	0	1	1	0	0	0	1	0	1	0	1	0	0	1	0	0	0	1	1	17
2	0	49	0	0	0	1	1	1	1	1	1	0	1	0	0	0	0	0	0	0	0	1	1	0
2	6	51	0	0	0	1	1	1	1	1	0	0	1	0	0	0	1	0	0	0	0	1	1	6
2	6	20	0	0	0	1	1	1	1	1	1	0	0	0	0	0	1	0	1	0	0	1	1	6
2	1	27	0	1	0	2	1	0	1	1	1	0	1	0	0	0	1	0	0	0	0	1	1	4
2	5	48	0	1	1	1	1	1	1	1	1	0	0	0	0	0	1	0	0	0	0	1	1	11
2	3	25	0	1	0	1	1	1	1	1	1	0	0	0	0	0	0	1	0	0	0	1	1	6
2	1	24	0	1	1	1	1	1	0	1	1	1	0	0	0	0	0	0	0	0	0	1	1	5
3	0	25	1	1	0	1	1	1	1	0	1	0	0	0	0	0	0	1	0	0	0	1	0	1
3	0	37	0	1	0	1	1	1	1	1	0	0	0	0	0	1	0	0	0	0	0	1	0	1
3	12	44	1	1	0	1	0	1	1	1	1	0	0	0	0	0	1	0	0	0	0	1	0	13
3	6	39	0	0	0	1	0	0	0	0	1	0	1	0	0	0	0	0	0	0	0	1	0	6
3	1	45	0	0	0	1	1	1	1	0	0	0	1	0	0	0	0	0	0	0	0	1	0	1
3	0	25	0	1	0	1	1	1	1	1	1	0	0	0	0	0	0	0	0	0	0	1	0	3
3	5	41	0	0	0	1	1	1	1	1	1	0	1	0	0	0	1	0	0	0	0	1	0	5
3	0	32	0	0	0	1	1	0	1	1	1	0	0	0	0	0	1	0	0	0	0	1	0	0
3	4	26	0	1	0	1	1	0	1	1	1	0	1	0	0	0	0	0	0	0	0	1	0	7
3	2	24	1	1	0	1	1	1	1	1	1	0	1	0	0	0	0	0	0	0	0	1	0	3
3	6	27	1	1	0	1	1	0	1	1	1	0	0	0	0	0	0	1	0	0	0	1	0	7
3	2	37	0	0	0	2	1	1	1	1	0	0	0	0	0	0	0	0	0	0	0	1	0	2
3	3	37	0	0	0	2	1	1	1	0	1	1	0	0	0	0	1	0	0	0	0	1	0	3
3	0	26	0	1	0	1	1	0	1	1	1	0	1	0	0	0	0	1	0	0	0	1	0	8
3	1	25	0	1	0	1	1	1	1	1	1	0	0	0	0	0	0	0	0	0	0	1	0	5
3	0	30	0	1	0	1	1	0	1	1	1	0	1	0	0	0	1	0	0	0	0	1	0	7
3	11	33	0	1	0	1	1	0	1	1	1	0	0	0	0	0	0	1	0	0	0	1	0	12
3	14	31	0	1	1	1	1	1	1	1	1	0	0	0	0	0	0	0	0	0	0	1	0	15
3	0	33	0	0	0	1	1	0	1	1	0	0	1	0	1	0	0	0	0	0	0	1	0	0
3	0	31	0	1	0	1	1	1	1	1	1	0	0	0	0	0	1	1	0	0	0	1	0	7
3	15	34	0	0	0	1	1	1	1	1	1	0	1	0	0	0	0	0	0	0	0	1	0	15
3	0	40	1	1	0	1	0	1	0	1	0	0	1	0	0	0	0	0	0	0	0	1	0	3
3	2	25	0	1	0	1	1	1	1	1	1	0	0	0	0	0	0	0	0	0	0	1	0	7
3	2	31	0	0	1	1	1	1	1	1	1	0	0	0	0	0	0	0	0	0	0	1	0	2
3	9	31	0	1	1	1	1	1	0	0	1	0	0	0	0	0	1	0	0	0	0	1	0	9
3	2	32	1	1	0	1	0	0	1	1	1	0	0	0	0	0	0	0	0	0	0	1	0	18
3	1	34	0	1	0	1	1	1	1	1	0	0	0	0	0	0	0	0	0	0	0	1	0	3
3	13	31	0	1	0	1	1	0	1	1	1	0	1	0	0	0	0	0	0	0	0	1	0	14
3	0	27	0	1	0	1	1	1	1	0	0	0	0	0	0	0	1	0	0	0	0	1	0	11
3	20	49	0	1	0	1	1	0	1	1	1	0	0	0	0	0	0	0	0	0	0	1	0	20
3	1	58	0	1	0	1	1	1	1	1	0	0	1	0	0	0	0	0	0	0	0	1	0	3
3	0	29	0	1	0	1	1	1	0	0	1	1	0	0	0	0	1	0	0	0	0	1	0	9
3	1	28	1	1	0	1	1	0	1	0	0	0	0	0	0	0	1	0	0	0	0	1	0	1
3	0	49	0	1	0	1	1	0	1	1	0	0	1	0	0	0	0	0	0	0	0	1	0	17
3	0	26	0	1	0	1	1	0	0	1	1	0	0	0	0	0	0	0	0	0	0	1	0	11
3	7	25	0	1	0	1	1	0	0	1	1	1	1	0	0	0	0	0	0	0	0	1	0	7
3	0	32	0	1	0	1	1	0	1	1	1	0	0	0	0	0	0	0	0	0	0	1	0	5
3	1	29	1	1	0	1	1	1	1	0	1	0	0	0	0	0	0	0	0	0	0	1	0	15
3	0	28	0	1	0	1	1	1	0	1	1	0	1	0	1	0	1	0	0	0	0	1	0	7
3	18	39	0	1	0	1	1	0	1	1	1	0	1	0	0	0	1	0	0	0	0	1	0	18
3	14	36	0	0	0	1	1	0	1	1	1	0	0	0	0	0	0	0	0	0	0	1	0	14
3	8	35	0	1	0	1	1	1	1	1	1	0	0	0	0	0	1	0	0	0	0	1	0	9
3	5	32	0	1	0	1	1	0	1	1	1	0	1	0	0	0	0	1	0	0	0	1	0	5
3	1	37	0	0	0	1	1	1	1	1	0	0	0	0	0	0	1	0	0	0	0	1	0	1
3	1	52	1	1	1	1	1	0	1	1	0	0	0	0	0	0	0	0	0	0	0	1	0	14
3	7	45	0	1	0	1	1	0	1	1	0	0	0	0	0	0	1	0	0	0	0	1	0	7
3	2	42	0	0	0	1	1	1	1	1	1	0	1	0	0	0	0	0	0	0	0	1	0	2
3	2	28	0	1	0	1	1	1	1	1	1	0	0	0	0	0	0	0	0	0	0	0	0	9
3	0	24	1	1	1	2	1	0	0	1	1	0	1	0	1	0	0	0	0	0	0	1	0	2
3	0	52	0	1	1	1	1	0	1	0	1	1	1	0	0	0	0	0	1	0	0	1	0	22
3	19	37	0	0	0	1	1	1	1	1	0	0	0	0	0	0	1	0	0	0	0	1	0	19
3	0	38	0	0	0	1	1	1	1	1	1	0	1	0	0	0	1	0	0	0	0	1	0	1
3	4	35	0	0	0	2	1	1	1	1	1	0	1	0	0	0	0	0	0	0	0	1	0	4
3	0	26	1	1	0	1	0	0	0	1	0	0	0	0	0	0	0	1	0	0	0	1	0	7
3	0	55	0	0	0	1	1	0	0	1	0	0	1	0	0	0	0	0	0	0	0	1	0	15
3	0	32	0	0	0	1	1	0	1	1	1	0	0	0	0	0	0	0	0	0	0	1	0	0
3	6	26	0	1	0	1	1	1	1	1	0	0	0	0	0	0	0	0	0	0	0	1	0	6
3	0	35	0	1	0	1	1	0	1	1	1	0	1	0	0	0	0	0	0	0	0	1	0	7
3	21	50	0	0	0	1	1	1	1	1	1	0	1	0	0	0	1	0	0	0	0	1	0	21
3	1	39	0	1	0	1	1	1	1	1	1	1	1	0	0	0	1	0	0	0	0	0	0	13
3	11	41	0	1	0	1	0	1	1	1	1	0	1	0	0	0	1	0	0	0	0	1	0	11
3	0	31	1	1	0	1	1	0	0	1	1	0	0	0	0	0	0	1	0	0	0	1	0	11
3	6	32	0	1	0	1	1	1	1	1	0	0	1	0	0	0	0	0	0	0	0	0	0	11
3	8	36	0	1	0	1	1	1	1	1	0	0	0	0	0	0	1	0	0	0	0	1	0	20
3	2	32	1	1	1	1	1	1	1	1	0	0	1	0	0	0	0	0	0	0	0	1	0	7
3	5	37	0	1	1	1	1	1	1	1	1	0	0	0	0	0	1	0	0	0	0	1	0	7
3	0	28	0	1	0	1	1	1	0	0	0	0	0	0	0	0	0	0	1	0	0	1	0	9
3	0	33	0	1	0	2	1	1	1	1	0	0	0	0	1	0	0	0	1	0	0	1	0	1
3	0	27	0	1	0	1	1	0	1	0	0	0	0	0	0	0	0	1	0	0	0	1	0	9
3	8	30	0	1	0	1	1	1	1	1	0	0	0	0	0	0	0	1	0	0	0	0	0	8
3	0	23	0	1	0	1	1	1	1	1	1	0	1	0	0	0	0	1	0	0	0	1	0	1
3	15	32	0	1	0	1	1	1	0	1	0	1	1	0	0	0	1	1	1	0	0	1	0	15
3	0	44	1	1	0	1	1	1	0	0	0	0	1	0	0	0	0	0	0	0	0	1	0	27
3	0	33	0	1	0	1	1	1	1	1	0	0	0	0	0	0	0	1	0	0	0	1	0	9
3	0	47	0	1	0	1	1	1	1	1	1	0	1	0	0	0	0	0	0	0	0	1	0	8
3	0	53	0	1	0	1	1	0	0	0	0	0	1	0	0	0	0	0	0	0	0	1	0	7
3	2	30	0	1	0	1	1	1	0	0	0	1	0	0	0	0	1	0	0	0	0	1	0	2
3	4	27	0	0	0	2	1	1	1	1	1	0	0	0	0	0	1	0	0	0	0	1	0	4
3	1	24	0	1	1	1	1	1	1	1	1	0	0	0	0	0	0	0	0	0	0	1	0	2
3	19	43	1	1	0	1	1	1	1	1	1	0	1	0	0	0	0	0	0	0	0	1	0	19
3	2	46	1	1	0	1	1	1	1	1	1	0	1	0	0	0	0	0	0	0	0	1	0	28
3	0	42	0	1	0	1	1	1	1	1	1	0	0	0	0	0	0	0	0	0	0	1	0	21
3	2	35	0	1	0	1	0	1	0	1	1	0	1	0	0	0	0	0	0	0	0	1	0	4
3	0	28	0	1	0	1	1	1	1	1	1	0	0	0	0	0	1	0	0	0	0	1	0	10
3	1	46	0	1	1	1	1	1	1	1	1	0	1	0	0	0	1	0	0	0	0	1	0	1
3	1	26	1	1	0	1	1	1	0	0	0	0	0	0	0	0	0	0	0	0	0	1	0	2
3	20	46	0	1	0	1	1	1	1	1	1	0	0	0	0	0	0	0	0	0	0	1	0	20
3	0	42	0	1	0	1	1	0	1	0	0	1	1	0	0	0	0	1	1	0	0	1	0	17
3	0	43	1	1	0	2	1	1	0	0	0	0	1	0	1	0	0	0	0	0	0	1	0	13
3	16	37	0	1	0	1	1	1	1	1	1	0	0	0	0	0	0	0	0	0	0	1	0	16
3	0	25	1	1	0	1	1	1	0	1	1	0	1	0	0	0	1	0	1	0	0	1	0	5
3	0	30	0	1	0	1	1	1	1	1	1	0	1	0	0	0	0	0	0	0	0	1	0	8
3	8	19	1	1	0	1	0	0	0	1	1	0	0	0	0	0	0	0	0	0	0	1	0	8
3	0	26	0	1	0	1	1	1	1	1	1	0	0	0	0	0	0	0	0	0	0	1	0	6
3	1	37	0	0	0	1	1	0	1	1	1	0	0	0	0	0	0	0	0	0	0	1	0	1
3	0	51	0	1	0	1	1	1	1	1	1	0	1	0	0	0	0	0	0	0	0	1	0	2
3	26	47	1	1	0	1	1	0	1	1	1	0	0	0	0	0	0	0	0	0	0	1	0	26
3	3	34	0	1	0	1	1	0	1	1	1	0	0	0	0	0	0	1	0	0	0	1	0	6
3	0	42	0	1	0	1	1	0	1	1	1	0	0	0	0	0	1	0	0	0	0	1	0	28
3	1	58	1	1	0	1	0	0	0	1	1	0	1	0	0	0	1	0	0	0	0	1	0	16
3	7	47	0	1	1	1	1	1	0	0	0	0	0	0	0	0	1	0	1	0	0	1	0	7
3	0	42	1	1	0	1	1	1	1	1	1	0	0	0	0	0	1	0	1	0	0	1	0	13
3	10	48	1	1	0	1	0	0	0	0	0	0	0	0	0	0	0	0	0	0	0	0	0	11
3	1	18	1	1	0	1	1	1	1	1	1	0	0	0	1	0	1	1	1	0	0	1	0	1
3	4	43	1	1	0	1	1	0	0	0	0	0	0	0	0	0	0	0	0	0	0	1	0	4
3	2	30	1	1	0	1	1	1	0	0	0	0	0	0	0	0	0	1	0	0	0	1	0	19
3	0	53	0	1	0	1	0	0	0	1	0	0	0	0	0	1	0	1	0	0	0	1	0	15
3	0	35	1	1	0	1	0	0	1	0	0	0	0	0	0	0	0	0	0	0	0	1	0	2
3	15	33	1	1	0	1	0	0	0	1	0	0	0	0	0	0	0	1	0	0	0	1	0	15
3	18	37	1	1	0	1	0	1	0	0	0	0	0	0	0	0	0	1	0	0	0	1	0	18
3	0	19	1	1	1	1	1	0	0	1	1	0	0	0	0	0	0	1	0	0	0	0	0	1
3	0	47	0	0	0	1	1	1	0	1	1	0	0	0	0	0	1	0	0	0	0	1	0	0
3	0	36	0	1	0	1	1	1	1	0	1	0	0	0	0	0	0	0	0	0	0	1	0	9
3	0	44	1	1	0	1	0	0	1	1	0	0	0	0	0	0	0	0	0	0	0	1	0	19
3	2	38	1	1	1	1	0	0	1	1	1	0	1	0	0	0	1	0	0	0	0	1	0	8
3	0	51	1	1	0	1	0	1	1	1	0	0	0	0	0	0	0	1	0	0	0	1	0	29
3	0	31	0	1	1	1	1	1	0	0	0	0	0	0	0	0	0	0	0	0	0	1	0	6
3	7	25	1	1	0	1	0	0	1	1	0	0	0	0	0	0	0	1	0	0	0	1	0	7
3	14	29	0	1	1	1	1	1	1	0	1	0	0	0	0	0	0	0	0	0	0	1	0	14
3	30	59	1	1	0	1	1	1	1	0	0	0	1	0	0	0	1	0	0	0	0	1	0	30
3	1	29	1	1	0	1	1	0	1	1	1	0	0	0	0	0	0	1	0	0	0	1	0	4
3	0	57	1	1	1	1	1	1	1	1	1	0	0	0	0	0	1	0	0	0	0	1	0	31
3	0	31	1	1	0	1	1	0	1	0	1	0	0	0	0	0	0	1	0	0	0	1	0	12
3	1	34	0	1	0	1	1	0	1	0	0	0	1	0	0	0	0	0	0	0	0	1	0	2
3	0	30	0	1	0	1	1	1	0	1	1	0	0	0	0	0	0	1	0	0	0	1	0	7
3	0	33	1	1	0	1	0	0	1	1	0	0	0	0	0	0	0	1	0	0	0	0	0	9
3	7	50	1	1	0	1	1	1	0	1	0	0	0	0	0	0	0	1	0	0	0	1	0	7
3	0	28	1	1	0	1	0	0	1	1	0	0	0	0	0	0	0	1	0	0	0	1	0	5
3	0	25	0	1	0	1	0	1	1	0	0	0	0	0	0	0	0	1	0	0	0	1	0	11
3	3	28	1	1	0	1	1	0	1	1	0	0	0	0	0	0	0	0	0	0	0	1	0	4
3	0	27	1	1	0	1	1	0	1	1	1	0	1	0	1	0	0	1	0	0	0	1	0	2
3	29	44	0	1	0	1	1	0	0	0	0	0	0	0	0	0	0	0	0	0	0	1	0	29
3	15	37	1	1	0	1	1	0	1	1	1	0	0	0	0	0	1	1	1	0	0	1	0	15
3	0	52	1	1	1	1	1	1	0	0	0	0	0	0	0	0	0	0	0	0	0	1	0	7
3	0	34	1	1	0	1	1	1	1	1	1	0	0	0	0	0	0	1	0	0	0	1	0	11
3	0	33	0	1	0	1	1	1	1	1	1	0	0	0	0	0	0	0	0	0	0	1	0	5
3	0	34	1	1	0	1	1	0	0	0	0	0	1	0	0	0	0	1	0	0	0	1	0	6
3	0	28	1	1	1	1	1	1	0	0	0	0	0	0	1	0	0	1	0	0	0	1	0	13
3	1	22	0	1	0	1	1	0	0	1	1	0	0	0	0	0	1	0	0	1	1	1	0	4
